# Supplementary material for: Three-dimensional tellurium and nitrogen Co-doped mesoporous carbons for high performance supercapacitors
Source: Royal Society of Chemistry journal article supplement (doi:10.1039/d0ra10374h), 2021-01-01
Supplement: d0ra10374h1.pdf [file d0ra10374h1.pdf]

## Supporting Information

### **Tellurium/nitrogen-doped mesoporous carbon composite material as supercapacitor electrode with outstanding cyclic stability**

Chang Ki Kim<sup>+</sup>, Jung-Min Ji<sup>+</sup>, M. Aftabuzzaman and Hwan Kyu Kim<sup>\*</sup>

*Global GET-Future Laboratory & Department of Advanced Materials Chemistry, Korea  
University, 2511 Sejong-ro, Sejong 339-700, Korea, E-mail: [hkk777@korea.ac.kr](mailto:hkk777@korea.ac.kr)*

<sup>+</sup>These authors contributed equally to this work.

<sup>\*</sup>To whom correspondence should be addressed: Email: [hkk777@korea.ac.kr](mailto:hkk777@korea.ac.kr)

**Characterization.** Thermogravimetric analysis (TGA: N-1000 Instrument) was used to

analyze the mass loss during the stabilization and carbonization process. Nitrogen adsorption–desorption isotherms were obtained at  $-196^{\circ}\text{C}$  using a Micromeritics ASAP 2020. XRD patterns of the samples were obtained using a Rigaku SmartLab diffractometer with Cu K $\alpha$  radiation operated at 40 kV and 30 mA. Raman spectra were obtained with a confocal Raman spectrometry (Jobin Yvon HR800, Horiba) using a 632.8 nm diode laser. The morphology was investigated using a field emission scanning electron microscope (FE-SEM: S-4700 Hitachi, Japan operated at an acceleration voltage of 10 kV) and a high-resolution transmission electron microscope (HRTEM: EM 912 Omega at 120 kV) equipped with an EDS analyzer. The chemical composition and structure were analyzed by XPS conducted on an AXIS-NOVA (Kratos) X-ray photoelectron spectrometer using an Al K $\alpha$  X-ray source operated at 150 W at a pressure of  $2.6 \times 10^{-9}$  Torr.

**Preparation of electrodes.** The working electrodes were fabricated by coating a slurry containing 80 wt% active material, 10 wt% Super P and 10 wt% polyvinylidene fluoride (PVDF) onto nickel foam (99.8% pure, MTI Corp.). The amount of active material loaded was about 2–3 mg on the Ni foam and the Ni foam area was 1 cm<sup>2</sup> (the amount of active material: 2–3 mg cm<sup>-2</sup>).

**Electrochemical measurement.** The electrochemical tests were conducted in a three electrode cell system on an Iviumstat electrochemical workstation with 6 M KOH as the electrolyte, and platinum and Ag/AgCl (3 M KCl) counter and reference electrodes, respectively. The working electrodes were soaked thoroughly in the electrolyte prior to performing measurements. The CV curves were measured at different scan rates from 10 to 100 mV s<sup>-1</sup> in a potential range of 0 to -1 V. Galvanostatic charge–discharge (CD) curves were obtained at different current densities from 1 A g<sup>-1</sup> to 10 A g<sup>-1</sup>. The specific capacitance  $C_S$  (F g<sup>-1</sup>) of electrode materials was

calculated from the CV curves and GCD curves according to equations (1) and (2), respectively:

$$C_m = \frac{1}{2Vmv} \int idV \quad (1)$$

$$C_m = \frac{i \times \Delta t}{m\Delta V} \quad (2)$$

where  $i$  is the discharge current,  $\int idV$  is the area of the CV curve between 0 and -1.0 V,  $V$  is the applied voltage,  $m$  is the mass of the active material,  $v$  is the scan rate and  $t$  is the discharge time.

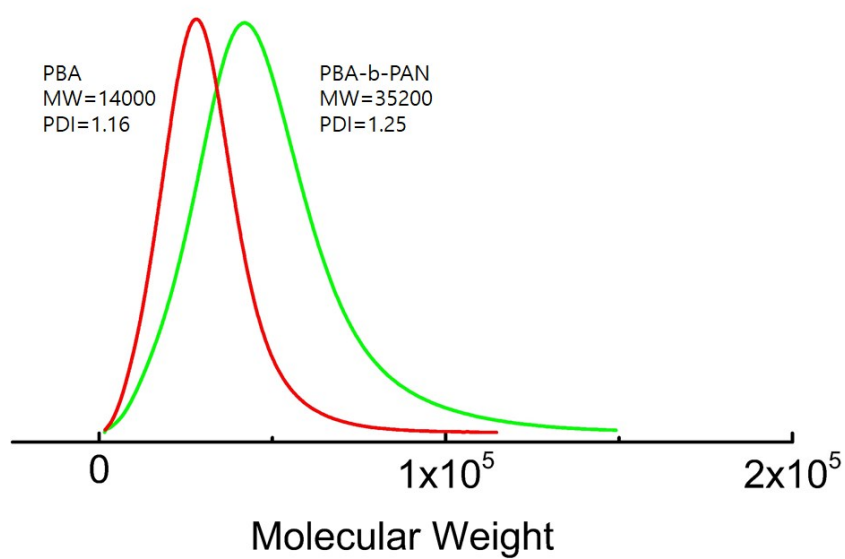

**Fig. S1** GPC traces of (a) PBA macroinitiator and PBA-*b*-PAN block copolymer.

**Table S1.** Partial list of heteroatom- and metal oxide- incorporated carbon materials as per the earlier reported studies.

| Electrode Materials                                   | Surface area (m <sup>2</sup> g <sup>-1</sup> ) | Pore volume (cm <sup>3</sup> g <sup>-1</sup> ) | Heteroatom Content (at. %)                                        | Electrolyte                        | Specific Capacitance                                 | Cycling life                  | Ref. <sup>a</sup> |
|-------------------------------------------------------|------------------------------------------------|------------------------------------------------|-------------------------------------------------------------------|------------------------------------|------------------------------------------------------|-------------------------------|-------------------|
| B-doped rGO (reduced graphene oxide)                  | 1102                                           | 1.175                                          | B: 12.90<br>O: 16.40                                              | 6 M KOH                            | 336.4 F g <sup>-1</sup><br>at 0.1 A g <sup>-1</sup>  | 93% after<br>5,000 cycles     | 37                |
| N/O-doped activated carbon                            | 3289                                           | 3.68                                           | N: 7.35<br>O: 3.54                                                | 2 M KOH                            | 524 F g <sup>-1</sup><br>at 0.5 A g <sup>-1</sup>    | 88% after<br>10,000 cycles    | 38                |
| Passivated P-doped rGO                                | 420                                            | -                                              | O: 4.90<br>P: 2.85                                                | 6 M KOH                            | 108 F g <sup>-1</sup><br>at 1 A g <sup>-1</sup>      | 70.4% after<br>2,000 cycles   | 41                |
| N/O/S-doped porous carbon                             | 2917                                           | 2.40                                           | N: 1.60<br>O: 9.94<br>S: 3.31                                     | 6 M KOH                            | 409 F g <sup>-1</sup><br>at 1 A g <sup>-1</sup>      | 90.4% after<br>20,000 cycles  | 43                |
| N/F/B-doped porous carbon                             | -                                              | -                                              | B: 0.53<br>N: 4.00<br>O: 6.50<br>F: 0.30                          | 1 M H <sub>2</sub> SO <sub>4</sub> | 350.4 F g <sup>-1</sup><br>at 1 A g <sup>-1</sup>    | 100% after<br>10,000 cycles   | 39                |
| Te-doped rGO                                          | -                                              | -                                              | Te: 1.00                                                          | 1 M H <sub>2</sub> SO <sub>4</sub> | 460 F g <sup>-1</sup><br>at 0.5 A g <sup>-1</sup>    | 100% after<br>2,000 cycles    | 44                |
| N/Se-doped GO                                         | 336.8                                          | 1.41                                           | N: 5.89<br>O: 8.57<br>Se: 2.13                                    | 6 M KOH                            | 302.9 F g <sup>-1</sup><br>at 1 A g <sup>-1</sup>    | 94.1% after<br>12,000 cycles  | 45                |
| Ru doped porous carbon                                | 450.2                                          | 0.33                                           | N: 3.19<br>O: 14.00<br>Ru: 7.39                                   | 6 M KOH                            | 562.8 F g <sup>-1</sup><br>at 1 A g <sup>-1</sup>    | 100% after<br>5,000 cycles    | 46                |
| CoMo <sub>2</sub> S <sub>4</sub> /S-doped 3D graphene | 423.7                                          | -                                              | -                                                                 | 6 M KOH                            | 1288.8 F g <sup>-1</sup><br>at 1 A g <sup>-1</sup>   | 91.8% after<br>2,000 cycles   | 47                |
| CoNiWO <sub>4</sub> /P/S-doped graphene nanosheet     | 94.4                                           | 0.176                                          | O: 20.40<br>P: 3.09<br>S: 2.87<br>Co: 1.83<br>Ni: 1.81<br>W: 3.22 | 6 M KOH                            | 1298.6 F g <sup>-1</sup><br>at 0.5 A g <sup>-1</sup> | > 95.5% after<br>7,500 cycles | 48                |

<sup>a</sup> All references cited in the manuscript.
